# Supplementary material for: Network Pharmacology-Based Validation of Caveolin-1 as a Key Mediator of Ai Du Qing Inhibition of Drug Resistance in Breast Cancer
Source: Front Pharmacol. 2018 Oct 2;9:1106. doi: 10.3389/fphar.2018.01106 (PMC6176282; doi:10.3389/fphar.2018.01106)
Supplement: TABLE S1 — The establishment of calibration curves for HPLC analysis. [file Table_1.DOC]

**Supplementary Tables:**

**Supplementary Table 1:** The establishment of calibration curves for HPLC analysis.

| **Analyte** | **Calibration curve** | ***R2*** | **Linear range(μg/mL)** |
| --- | --- | --- | --- |
| *p*-Coumaric acid | *Y* = 69.996*X* - 5.5249 | 0.9999 | 1.05~21.0 |
| Calycosin-7-glucoside | *Y* = 16.703*X* + 8.8779 | 0.9997 | 4.0~40.0 |
| Liquiritin | *Y* = 17.059*X* + 15.766 | 0.9995 | 10.0~200 |
| Glycyrrhizic acid | *Y* = 6.961*X*- 5.3055 | 0.9997 | 10.5~210 |
| Curcumol | *Y* = 4.5638*X* + 0.0903 | 0.9998 | 1.1~22.0 |

**Supplementary Table 2:** The Contents of Five Components in ADQ.

|  | **Contents (mg/g)** | | | | |
| --- | --- | --- | --- | --- | --- |
| **p-Coumaric acid** | **Calycosin-7-glucoside** | **Liquiritin** | **Glycyrrhizic acid** | **Curcumol** |
| 1 | 0.4323 | 1.3934 | 22.1439 | 14.1081 | 1.7293 |
| 2 | 0.4417 | 1.7323 | 22.7694 | 14.1838 | 1.1414 |
| 3 | 0.4410 | 1.9672 | 22.5299 | 11.0368 | 5.2054 |
| 4 | 0.4065 | 1.4825 | 21.0420 | 10.1345 | 3.1234 |
| 5 | 0.4331 | 1.7981 | 21.2149 | 11.4325 | 2.1653 |

**Supplementary Table 3:** Information on candidate active compounds from BHSSC, EZ, HQ and GC herbs of ADQ decoration.

| **Chinese Name** | **Latin name** | **Number of Screening ingredients** | **Major ingredients** | **Number of Targets** |
| --- | --- | --- | --- | --- |
|
|
| 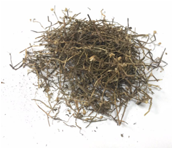白花蛇舌草 | | *Hedyotis diffusa* | | --- | | | 12 | deacetyl asperuloside acid_qt | 225 |
| quercetin |
| Poriferasterol |
| Stigmasterol |
| 2-methoxy-3-methyl-9,10-anthraquinone |
| beta-sitosterol |
| deacetylasperulosidic acid _qt |
| scandoside_qt |
| Geniposidic acid |
| rutin |
| ursolic acid |
| p-coumaric acid |
| 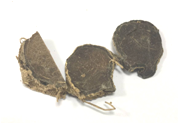莪 术 | | *Curcuma zedoaria (Christm.) Rosc* | | --- | | | 14 | ()-Aromadendrene | 41 |
| hederagenin |
| (-)-Epoxycaryophyllene |
| isocurcumenol |
| (1R,10R)-epoxy-1,10-dihydrocurdione |
| (3S,3aR,8aR)-3,8a-dihydroxy-5-isopropylidene-3,8-dimethyl-1,2,3a,4-tetrahydroazulen-6-one |
| (5R,6R)-5-isopropenyl-3,6-dimethyl-6-vinyl-5,7-dihydrobenzofuran-4-one |
| BRN 3094585 |
| curcumol |
| Gweicurculactone |
| (1S,10S),(4S,5S)-germacrone-1(10),4-diepoxide |
| Hepanal |
| 58870_FLUKA |
| calarene |
| 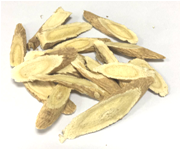黄 芪 | | *Astragalus membranaceus (Fisch.) Bunge.* | | --- | | | 21 | EIC | 222 |
| Mairin |
| Jaranol |
| hederagenin |
| (3S,8S,9S,10R,13R,14S,17R)-10,13-dimethyl-17-[(2R,5S)-5-propan-2-yloctan-2-yl]-2,3,4,7,8,9,11,12,14,15,16,17-dodecahydro-1H-cyclopenta[a]phenanthren-3-ol |
| isorhamnetin |
| 3,9-di-O-methylnissolin |
| 7-O-methylisomucronulatol |
| 9,10-dimethoxypterocarpan-3-O-β-D-glucoside |
| (6aR,11aR)-9,10-dimethoxy-6a,11a-dihydro-6H-benzofurano[3,2-c]chromen-3-ol |
| 13-hydroxy-9,11-octadecadienoic acid |
| Bifendate |
| formononetin |
| Calycosin |
| kaempferol |
| linolenic acid |
| FA |
| (Z)-1-(2,4-dihydroxyphenyl)-3-(4-hydroxyphenyl)prop-2-en-1-one |
| isomucronulatol-7,2'-di-O-glucosiole |
| 1,7-Dihydroxy-3,9-dimethoxy pterocarpene |
| quercetin |
| 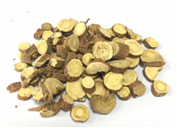甘 草 | | *Glycyrrhiza uralensis Fisch.* | | --- | | | 94 | Inermine | 241 |
| isoliquiritigenin |
| DFV |
| Mairin |
| Glycyrol |
| Jaranol |
| Medicarpin |
| Pinocembrin |
| isorhamnetin |
| sitosterol |
| Lupiwighteone |
| 7-Methoxy-2-methyl isoflavone |
| formononetin |
| Calycosin |
| kaempferol |
| naringenin |
| (2S)-2-[4-hydroxy-3-(3-methylbut-2-enyl)phenyl]-8,8-dimethyl-2,3-dihydropyrano[2,3-f]chromen-4-one |
| euchrenone |
| glyasperin B |
| glyasperin F |
| Glyasperin C |
| Isotrifoliol |
| (E)-1-(2,4-dihydroxyphenyl)-3-(2,2-dimethylchromen-6-yl)prop-2-en-1-one |
| kanzonols W |
| (2S)-6-(2,4-dihydroxyphenyl)-2-(2-hydroxypropan-2-yl)-4-methoxy-2,3-dihydrofuro[3,2-g]chromen-7-one |
| Semilicoisoflavone B |
| Glepidotin A |
| Glepidotin B |
| Phaseolinisoflavan |
| Glypallichalcone |
| echinatin |
| 8-(6-hydroxy-2-benzofuranyl)-2,2-dimethyl-5-chromenol |
| Licochalcone B |
| licochalcone G |
| 3-(2,4-dihydroxyphenyl)-8-(1,1-dimethylprop-2-enyl)-7-hydroxy-5-methoxy-coumarin |
| Licoricone |
| Gancaonin A |
| Gancaonin B |
| 3-(3,4-dihydroxyphenyl)-5,7-dihydroxy-8-(3-methylbut-2-enyl)chromone |
| 5,7-dihydroxy-3-(4-methoxyphenyl)-8-(3-methylbut-2-enyl)chromone |
| 2-(3,4-dihydroxyphenyl)-5,7-dihydroxy-6-(3-methylbut-2-enyl)chromone |
| Glycyrin |
| Licocoumarone |
| Licoisoflavone |
| Licoisoflavone B |
| licoisoflavanone |
| shinpterocarpin |
| (E)-3-[3,4-dihydroxy-5-(3-methylbut-2-enyl)phenyl]-1-(2,4-dihydroxyphenyl)prop-2-en-1-one |
| liquiritin |
| licopyranocoumarin |
| Glyzaglabrin |
| Glabridin |
| Glabranin |
| Glabrene |
| Glabrone |
| 1,3-dihydroxy-9-methoxy-6-benzofurano[3,2-c]chromenone |
| 1,3-dihydroxy-8,9-dimethoxy-6-benzofurano[3,2-c]chromenone |
| Eurycarpin A |
| (-)-Medicocarpin |
| Sigmoidin-B |
| (2R)-7-hydroxy-2-(4-hydroxyphenyl)chroman-4-one |
| (2S)-7-hydroxy-2-(4-hydroxyphenyl)-8-(3-methylbut-2-enyl)chroman-4-one |
| Isoglycyrol |
| Isolicoflavonol |
| HMO |
| 1-Methoxyphaseollidin |
| Quercetin der. |
| (Z)-1-(2,4-dihydroxyphenyl)-3-phenylprop-2-en-1-one |
| 3'-Hydroxy-4'-O-Methylglabridin |
| licochalcone a |
| 3'-Methoxyglabridin |
| 2-[(3R)-8,8-dimethyl-3,4-dihydro-2H-pyrano[6,5-f]chromen-3-yl]-5-methoxyphenol |
| Inflacoumarin A |
| icos-5-enoic acid |
| Kanzonol F |
| 6-prenylated eriodictyol |
| 7,2',4'-trihydroxy－5-methoxy-3－arylcoumarin |
| 7-Acetoxy-2-methylisoflavone |
| 8-prenylated eriodictyol |
| gadelaidic acid |
| Vestitol |
| Gancaonin G |
| Gancaonin H |
| Licoagrocarpin |
| Glyasperins M |
| Glycyrrhiza flavonol A |
| Licoagroisoflavone |
| Odoratin |
| Phaseol |
| Xambioona |
| dehydroglyasperins C |
| DIBP |
| DBP |
| quercetin |
| TCMSP screening criteria: OB: ≥30%; DL ≥0.1 | | | | |
|  |  |  |  |  |
